# Supplementary material for: Preparation and Improvement of Physicochemical and Functional Properties of Dietary Fiber from Corn Cob Fermented by Aspergillus niger
Source: PubMed Central journal article supplement (PMC10940746; doi:10.4014/jmb.2308.08010), 2023-10-16

## Graphical Abstract

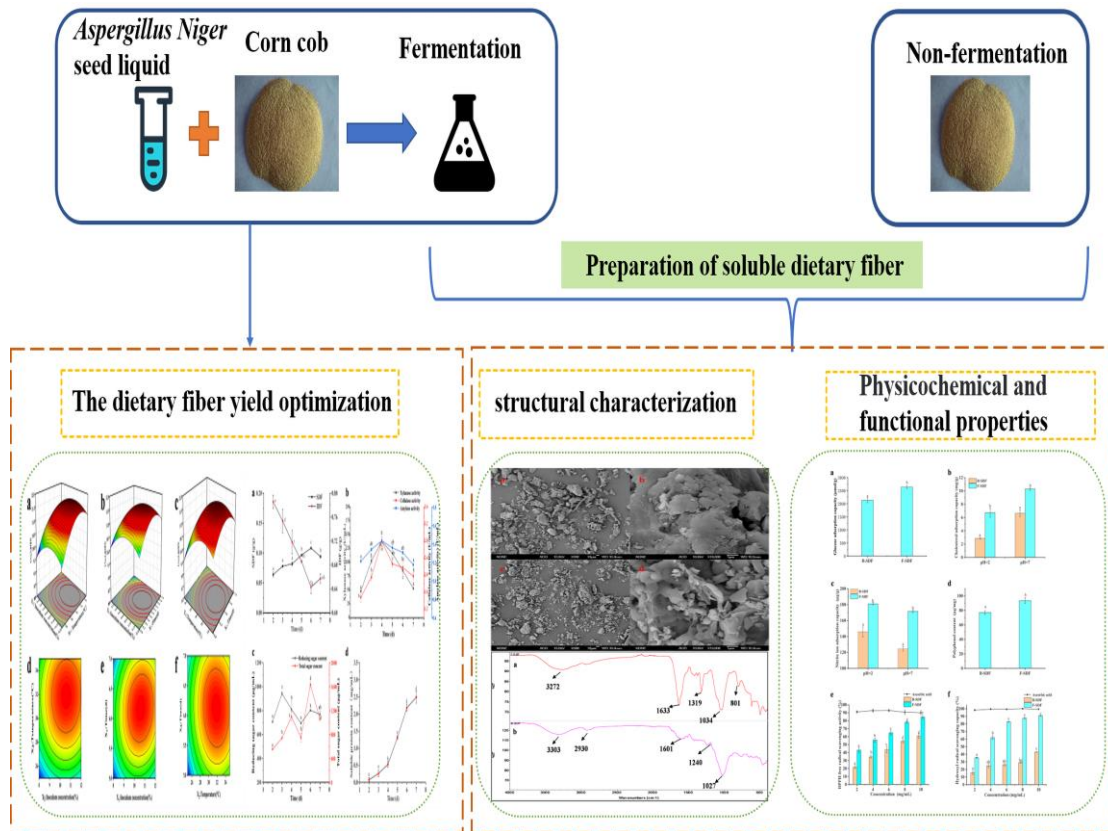

Supplement: jmb-34-2-330-supple.pdf [file jmb-34-2-330-supple.pdf]
